# Supplementary material for: Out of sight, out of mind? Evidence from cross-sectional surveys on hidden caesarean sections among women with stillbirths in Ghana, 2007 and 2017
Source: HighWire-hosted journal article supplement (doi:10.1136/bmjgh-2022-011591), 2023-06-01
Supplement: bmjgh-2022-011591supp004_data_supplement.pdf [file bmjgh-2022-011591supp004_data_supplement.pdf]

**SUPPLEMENTARY FILE 4 – Subgroup analysis: women with stillbirths (N=290)**

Similar to women with SBVEND, a subgroup analysis was performed in women with stillbirths. Women with very early neonatal deaths were excluded from bivariate and multivariable logistic regression.

Bivariate logistic regressions provided crude odds ratios (cOR) for each independent variables' category compared to a reference category. If five or fewer women per cell were observed, categories were collapsed.

Subsequently, multivariable logistic regression was used to identify risk factors for CS in women with stillbirth. The multivariable analysis included independent variables based on statistical significance in bivariate logistic regression. Instead of p-values below 0.05, variables with Wald F tests' p-values below 0.25 in bivariate analysis were considered statistically significant. Pearson correlations above 0.8 or Variance Inflation Factors higher than 4 were used to detect collinearity.

The following independent variables were included: residence, wealth index, exposure to mass media, religion, current marital status, educational status, multiple pregnancy, number of antenatal visits, antenatal care quality score, presence of peripartum complications and prolonged or obstructed labour. To reduce overfitting, we used backward elimination based on p-values to include six independent variables in the final model, having a minimum of ten caesarean sections per included variable. Adjusted ORs were provided (aOR). In bivariate and multivariable analyses, independent variables with an OR having a CI not containing the value 1 were considered statistically significant.

To assess effect modification by birth outcome (stillbirth or live birth) of household's wealth quintiles and maternal educational level on CS rates, we compared cORs using multivariable logistic regression with interaction terms. cORs were calculated for both independent variables' categories compared to a reference category in women with live births who survived the first day. These cORs were compared to cORs in women with live births using multivariable logistic regression with interaction terms. Adjusted ORs were provided as an effect size. Wald F tests of model effects were performed and p-values below 0.05 indicated statistical significance.

**Bivariate and multivariable logistic regression of variables associated with caesarean section in women with stillbirth (N=290)(weighted). Ghana Maternal Health Survey 2007 and 2017**

CS = caesarean section, VB = vaginal birth, OR = crude odds ratio, aOR = adjusted odds ratio, CI = confidence interval

\* Factors associated with CS in women having stillbirths and very early neonatal deaths with a Wald F-test p-value &lt;0.25

|                                     | Stillbirths<br>(N=290) |               |                  |                  |
|-------------------------------------|------------------------|---------------|------------------|------------------|
|                                     | CS<br>(N=63)           | VB<br>(N=227) | OR<br>(95% CI)   | aOR<br>(95% CI)  |
| Year of survey                      |                        |               |                  |                  |
| 2007                                | 24                     | 106           | 1                |                  |
| 2017                                | 39                     | 121           | 1.4 (0.7 – 3.0)  |                  |
| Ethnicity                           |                        |               |                  |                  |
| Akan                                | 37                     | 126           | 1                |                  |
| Ewe                                 | 7                      | 24            | 1.0 (0.3 – 3.0)  |                  |
| Mole-Dagbani                        | 7                      | 31            | 0.8 (0.3 – 2.2)  |                  |
| Other                               | 12                     | 46            | 0.9 (0.3 – 2.3)  |                  |
| Region                              |                        |               |                  |                  |
| Coastal                             | 26                     | 68            | 1                |                  |
| Middle                              | 29                     | 129           | 0.6 (0.3 – 1.3)  |                  |
| Northern                            | 7                      | 30            | 0.6 (0.2 – 1.7)  |                  |
| Residence*                          |                        |               |                  |                  |
| Rural                               | 25                     | 120           | 1                |                  |
| Urban                               | 37                     | 108           | 1.6 (0.8 – 3.4)  |                  |
| Household's wealth index*           |                        |               |                  |                  |
| Poor                                | 13                     | 96            | 1                |                  |
| Middle                              | 15                     | 46            | 2.4 (1.0 – 5.7)  |                  |
| Rich                                | 34                     | 86            | 2.9 (1.2 – 7.0)  |                  |
| Exposure to mass media*             |                        |               |                  |                  |
| Little exposed                      | 7                      | 42            | 1                | 1                |
| Moderately exposed                  | 19                     | 101           | 1.2 (0.4 – 3.3)  | 1.4 (0.4 – 4.2)  |
| Highly exposed                      | 37                     | 84            | 2.8 (1.1 – 7.5)  | 2.5 (0.8 – 7.3)  |
| Maternal age                        |                        |               |                  |                  |
| <35                                 | 44                     | 149           | 1                |                  |
| ≥35                                 | 19                     | 79            | 0.8 (0.4 – 1.7)  |                  |
| Religion*                           |                        |               |                  |                  |
| Christian                           | 43                     | 188           | 1                | 1                |
| Muslim, other religions, areligious | 19                     | 50            | 1.6 (0.8 – 3.4)  | 2.5 (1.0 – 6.5)  |
| Current marital status*             |                        |               |                  |                  |
| Married or living together          | 51                     | 180           | 1                | 1                |
| Not married or living together      | 12                     | 47            | 0.9 (0.4 – 2.1)  | 0.4 (0.2 – 1.2)  |
| Maternal educational status*        |                        |               |                  |                  |
| None                                | 8                      | 57            | 1                | 1                |
| Primary                             | 15                     | 44            | 2.3 (0.8 – 7.0)  | 2.9 (0.9 – 9.9)  |
| Middle                              | 25                     | 99            | 1.8 (0.8 – 4.2)  | 2.3 (0.7 – 7.3)  |
| Secondary or higher                 | 14                     | 28            | 3.6 (1.2 – 10.5) | 4.1 (1.1 – 15.4) |
| Parity                              |                        |               |                  |                  |
| 0                                   | 9                      | 58            | 1                |                  |
| 1-4                                 | 35                     | 113           | 2.0 (0.8 – 4.9)  |                  |
| ≥5                                  | 19                     | 57            | 2.2 (0.8 – 6.0)  |                  |
| History of perinatal death          |                        |               |                  |                  |
| No                                  | 51                     | 189           | 1                |                  |
| Yes                                 | 12                     | 38            | 1.2 (0.5 – 2.9)  |                  |
| Multiple pregnancy*                 |                        |               |                  |                  |
| No                                  | 51                     | 208           | 1                | 1                |
| Yes                                 | 12                     | 19            | 2.5 (0.9 – 6.8)  | 3.6 (1.6 – 8.4)  |
| Number of antenatal visits*         |                        |               |                  |                  |
| <4                                  | 6                      | 67            | 1                | 1                |
| ≥4                                  | 57                     | 160           | 3.9 (1.2 – 13.2) | 3.9 (1.3 – 11.8) |
| Antenatal care quality score*       |                        |               |                  |                  |
| Low (0-7)                           | 16                     | 98            | 1                |                  |
| High (8-9)                          | 47                     | 129           | 2.2 (1.0 – 4.6)  |                  |
| Peripartum complications*           |                        |               |                  |                  |
| No                                  | 30                     | 136           | 1                |                  |
| Yes                                 | 33                     | 91            | 1.6 (0.8 – 3.3)  |                  |
| Prolonged or obstructed labour*     |                        |               |                  |                  |
| No                                  | 51                     | 208           | 1                |                  |
| Yes                                 | 11                     | 19            | 2.3 (0.8 – 6.4)  |                  |

|                         |    |     |                 |  |
|-------------------------|----|-----|-----------------|--|
| Reduced fetal movements |    |     |                 |  |
| No                      | 56 | 213 | 1               |  |
| Yes                     | 7  | 14  | 1.9 (0.5 – 6.8) |  |

**Multivariable logistic regression with interaction terms assessing effect modification by birth outcome of household's wealth status and maternal educational level on caesarean section rates (N=17.138)(weighted). Ghana Maternal Health Survey 2007 and 2017**

CS = caesarean section, VB = vaginal birth, OR = crude odds ratio, aOR = adjusted odds ratio, CI = confidence interval

\* Wald F p-value serving as a measure of statistical significance. P-value <0.05 is considered statistically significant.

\*\* aOR and 95% confidence intervals serve as a measure of effect size of effect modification by birth outcome.

|                             | Stillbirths<br>(N=290) |               |                  | Live births<br>(N=16,848) |                  |                 | Wald F* and<br>aOR (95% CI)** |
|-----------------------------|------------------------|---------------|------------------|---------------------------|------------------|-----------------|-------------------------------|
|                             | CS<br>(N=63)           | VB<br>(N=227) | OR (95% CI)      | CS<br>(N=1,626)           | VB<br>(N=15,222) | OR (95% CI)     |                               |
| Household's wealth index    |                        |               |                  |                           |                  |                 | 0.36                          |
| Poor                        | 13                     | 96            | 1                | 346                       | 6,873            | 1               |                               |
| Middle                      | 15                     | 46            | 2.4 (1.0 – 5.7)  | 268                       | 3,116            | 1.7 (1.4 – 2.1) | 1.4 (0.6 – 3.4)               |
| Rich                        | 34                     | 86            | 2.9 (1.2 – 7.0)  | 1,012                     | 5,233            | 3.8 (3.3 – 4.5) | 0.8 (0.3 – 1.8)               |
| Maternal educational status |                        |               |                  |                           |                  |                 | 0.53                          |
| None                        | 8                      | 57            | 1                | 223                       | 4,610            | 1               |                               |
| Primary                     | 15                     | 44            | 2.3 (0.8 – 7.0)  | 252                       | 3,071            | 1.7 (1.3 – 2.2) | 1.4 (0.6 – 3.5)               |
| Middle                      | 25                     | 99            | 1.8 (0.8 – 4.2)  | 710                       | 5,736            | 2.6 (2.1 – 3.1) | 0.7 (0.2 – 2.2)               |
| Secondary or higher         | 14                     | 28            | 3.6 (1.2 – 10.5) | 441                       | 1,805            | 5.0 (4.1 – 6.3) | 1.4 (0.5 – 4.2)               |
